# Supplementary material for: Rapid bioassay to measure early reactive oxygen species production in Arabidopsis leave tissue in response to living Pseudomonas syringae
Source: PubMed Central journal article supplement (PMC3941562; doi:10.1186/1746-4811-10-6), 2014-02-26
Supplement: 1746-4811-10-6-S1.pdf [file 1746-4811-10-6-S1.pdf]

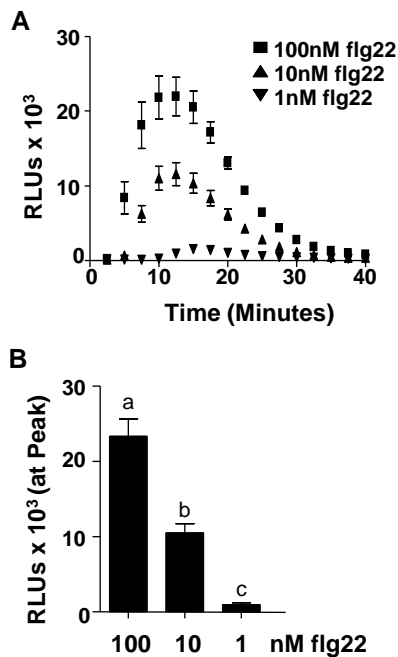

**Additional file 1. Dose-dependent ROS production in response to synthetic flg22 peptide. A:** Time-course of ROS production in response to 1, 10 and 100 nM flg22 in wild-type Col-0 leaf disc halves (n= 16/treatment). **B:** Bar graph representation of peak ROS production for each flg22 concentration from experiment shown in A. To allow direct comparisons, all ROS experiments were performed in the same 96-well plate at the same time. Values are mean  $\pm$  SE, means with different letters denote a significance difference (Two tailed student's t-test,  $P < 0.0001$ ). Experiment was repeated more than 3 times with similar results. RLU, Relative Light Units.
