# Supplementary material for: Rapid bioassay to measure early reactive oxygen species production in Arabidopsis leave tissue in response to living Pseudomonas syringae
Source: PubMed Central journal article supplement (PMC3941562; doi:10.1186/1746-4811-10-6), 2014-02-26
Supplement: 1746-4811-10-6-S2.pdf [file 1746-4811-10-6-S2.pdf]

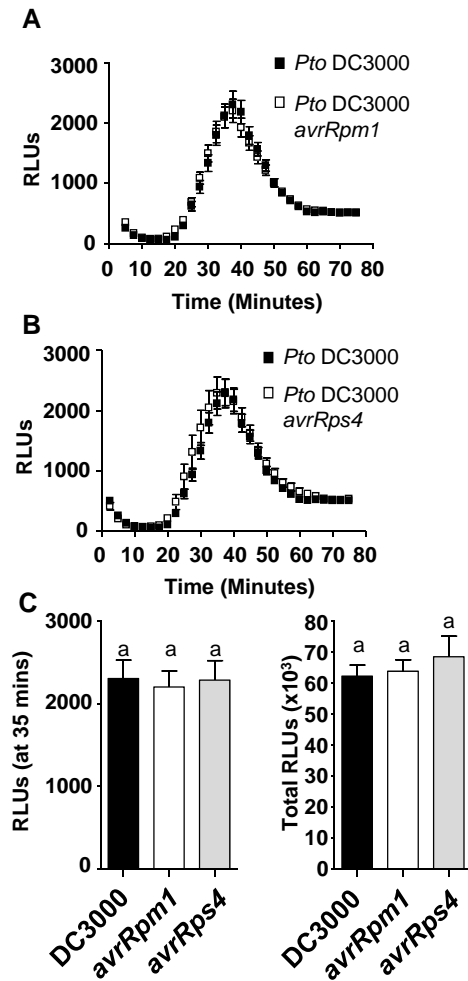

**Additional file 2. Transient ROS production in response to live *Pto* DC3000, *Pto* DC3000(*avrRpm1*) and *Pto* DC3000(*avrRps4*) in Col-0.** **A:** Time-course of ROS production between *Pto* DC3000 and *Pto* DC3000 *avrRpm1* (n=24/treatment). **B:** Time-course of ROS production between *Pto* DC3000 and *Pto* DC3000 *avrRps4* (n=24/treatment). **C:** ROS production induced by *Pto* DC3000 (black bar), *Pto* DC3000 *avrRpm1* (white bar) and *Pto* DC3000 *avrRps4* (gray bar) shown at peak ROS production (35 minutes post-elicitation) and as total Relative Light Units (RLUs) over 75 minutes following elicitation with indicated bacteria (n=24/treatment). To allow direct comparisons, ROS experiments in (A, B and C) were performed in the same 96-well plate at the same time. Values are mean  $\pm$  SE, means with different letters denote a significance difference while similar letters denote no significance (Two tailed student's t-test,  $P \geq 0.4084$ ). For all experiments, bacterial solutions were used at  $OD_{600}=0.1$ . Experiments were repeated more than 3 times with similar results. RLU, Relative Light Units.
