# Supplementary material for: Rapid bioassay to measure early reactive oxygen species production in Arabidopsis leave tissue in response to living Pseudomonas syringae
Source: PubMed Central journal article supplement (PMC3941562; doi:10.1186/1746-4811-10-6), 2014-02-26
Supplement: 1746-4811-10-6-S3.pdf [file 1746-4811-10-6-S3.pdf]

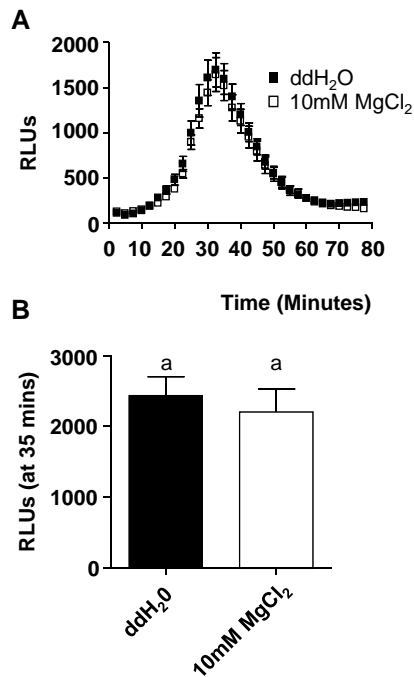

**Additional file 3. ROS production in response to live *Pto* DC3000 cells re-suspended in ddH<sub>2</sub>O or 10mM MgCl<sub>2</sub>.** **A:** Time-course of ROS production in response to *Pto* DC3000 resuspended in sterile ddH<sub>2</sub>O (closed symbols) or 10mM MgCl<sub>2</sub> (open symbols) in Col-0 leaf disc halves (n=24/treatment). **B:** Comparison of peak ROS production between *Pto* DC3000 resuspended in sterile ddH<sub>2</sub>O or 10mM MgCl<sub>2</sub> at the point of maximum ROS production (35 minutes post-elicitation from **A**). To allow for direct comparisons, all ROS experiments shown in (**A** and **B**) were performed in the same 96-well plate at the same time. Values are mean  $\pm$  SE, means with different letters denote a significance difference while similar letters denote no significance (Two tailed student's t-test, P=0.59). For all experiments, bacterial solutions were used at OD<sub>600</sub>=0.1. Experiment was repeated more than 3 times with similar results. RLU, Relative Light Units.
