# Supplementary material for: Rapid bioassay to measure early reactive oxygen species production in Arabidopsis leave tissue in response to living Pseudomonas syringae
Source: PubMed Central journal article supplement (PMC3941562; doi:10.1186/1746-4811-10-6), 2014-02-26
Supplement: 1746-4811-10-6-S4.pdf [file 1746-4811-10-6-S4.pdf]

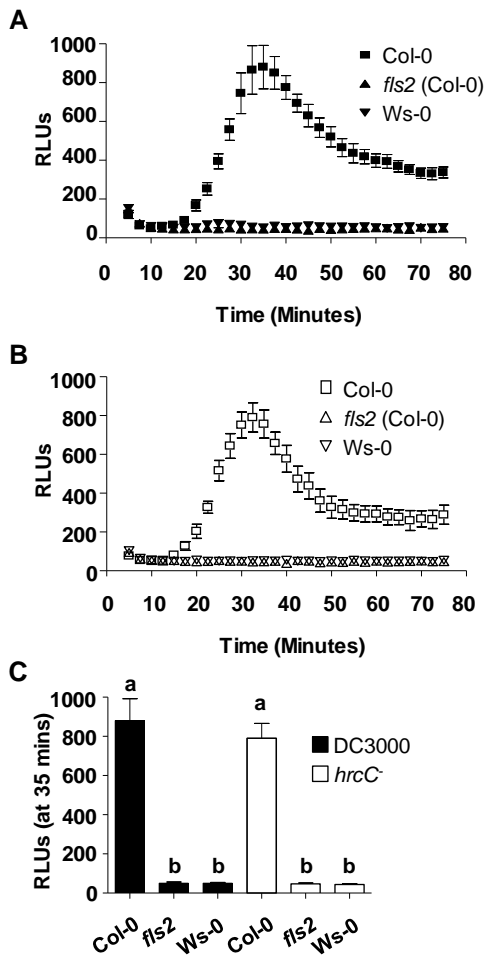

**Additional file 4. Lack of ROS production in *fls2* mutant of different *Arabidopsis* ecotypes in response to live *Pto* DC3000 and *Pto hrcC* cells. **A and B:** Time-course of ROS production in response to *Pto* DC3000 (**A**; closed symbols) or *Pto hrcC* (**B**; open symbols) in leaf disc halves of Col-0 (square), *fls2* (Col-0) null mutant (triangle) and Ws-0 (upside down triangle) (n=16/treatment). **C:** Comparison of peak ROS production between *Pto* DC3000 or *Pto hrcC* in Col-0, *fls2* (Col-0) and Ws-0 shown at the point of maximum ROS production (35 minutes post-elicitation from **A** and **B**). To allow for direct comparisons, all ROS experiments shown in (**A**, **B** and **C**) were performed in the same 96-well plate at the same time. Values are mean  $\pm$  SE, means with different letters denote a significance difference while similar letters denote no significance (Two tailed student's t-test,  $P < 0.0001$ ). For all experiments, bacterial solutions were used at  $OD_{600} = 0.1$ . Experiments were repeated more than 3 times with similar results. RLU, Relative Light Units.**
